# Supplementary material for: Alterations in Intestinal Brush Border Membrane Functionality and Bacterial Populations Following Intra-Amniotic Administration (Gallus gallus) of Nicotinamide Riboside and Its Derivatives
Source: MDPI journal article supplement (doi:10.3390/nu14153130), 2022-07-29
Supplement: s1 [file s1]

## Supporting Information

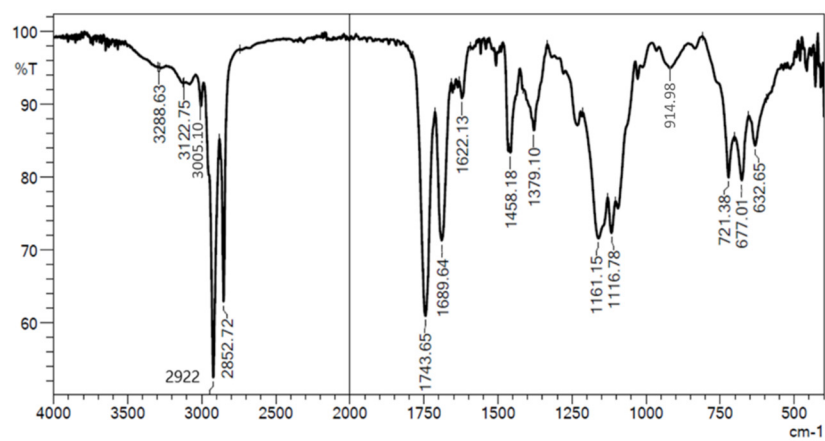

Figure S1. FTIR of NRTOCI.

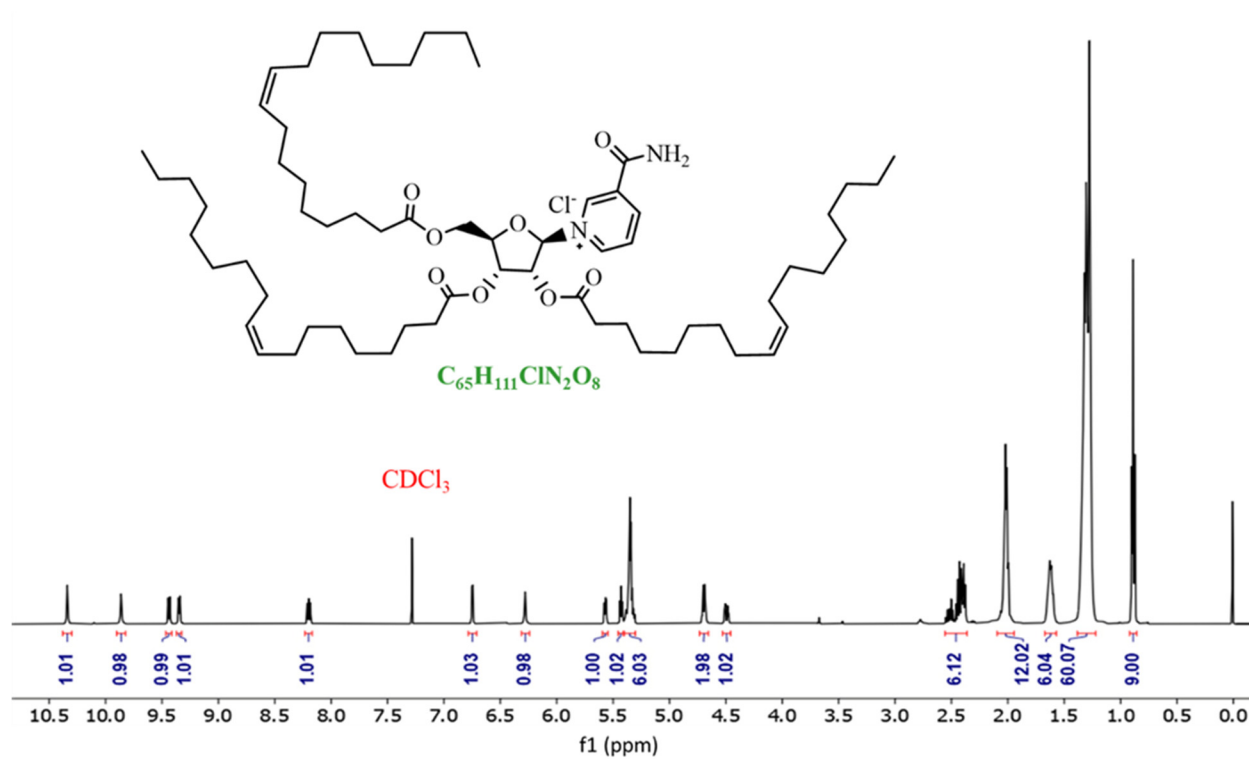

Figure S2. <sup>1</sup>H NMR of NRTOCI in CDCl<sub>3</sub>.

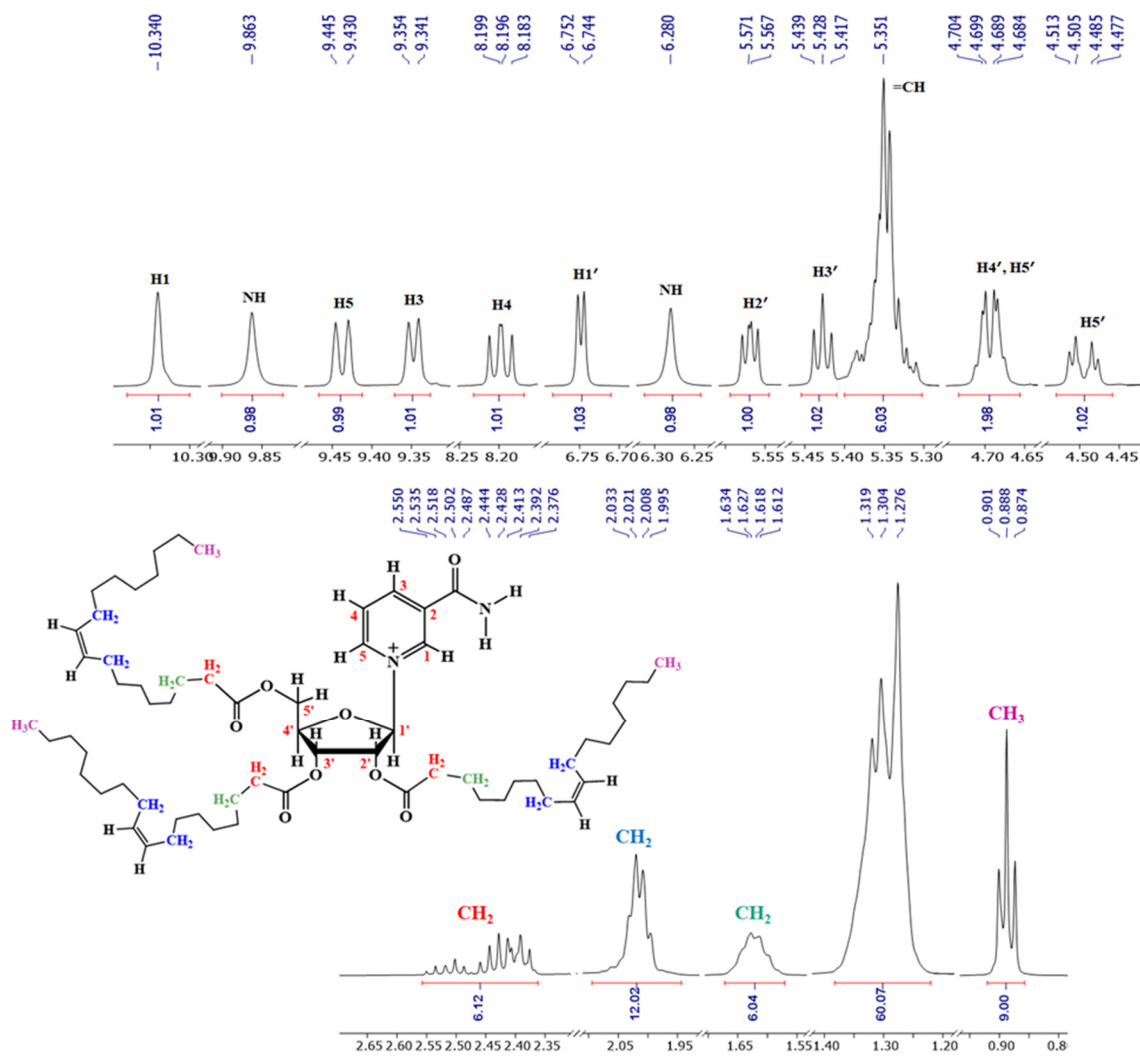

Figure S3. Expanded  $^1\text{H}$  NMR of NRTOCI.

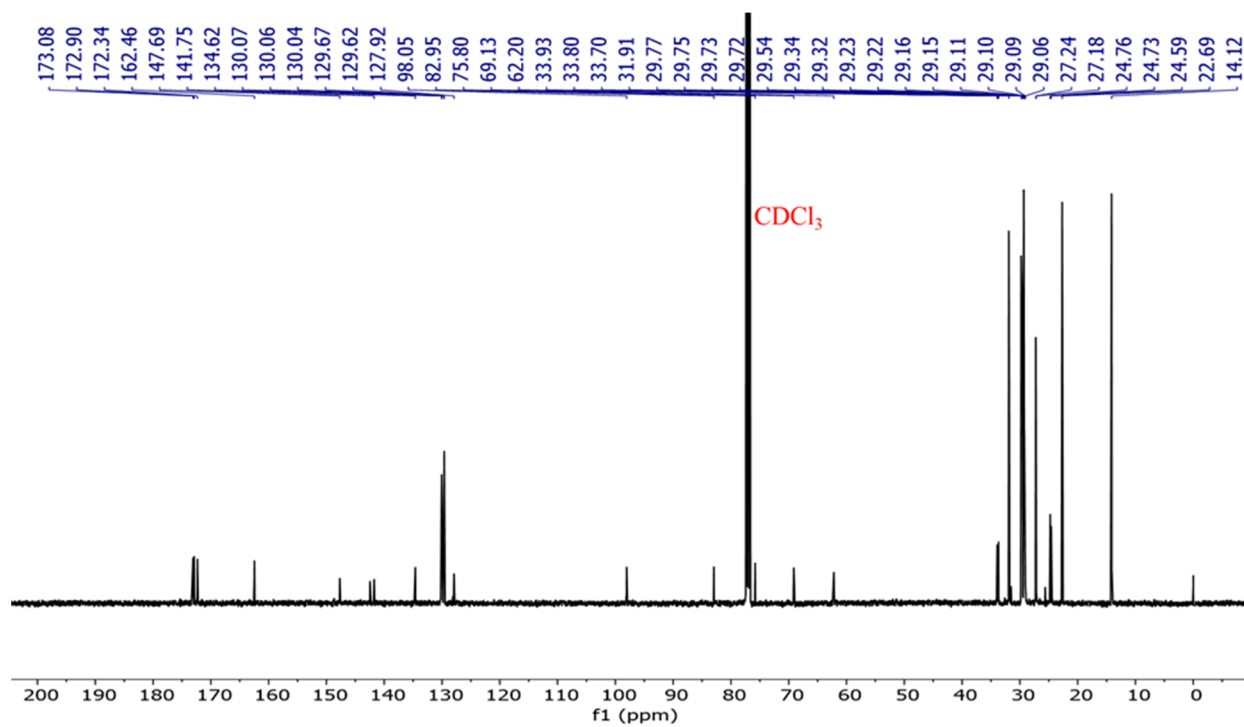

Figure S4.  $^{13}\text{C}$  NMR of NRTOCl in  $\text{CDCl}_3$ .

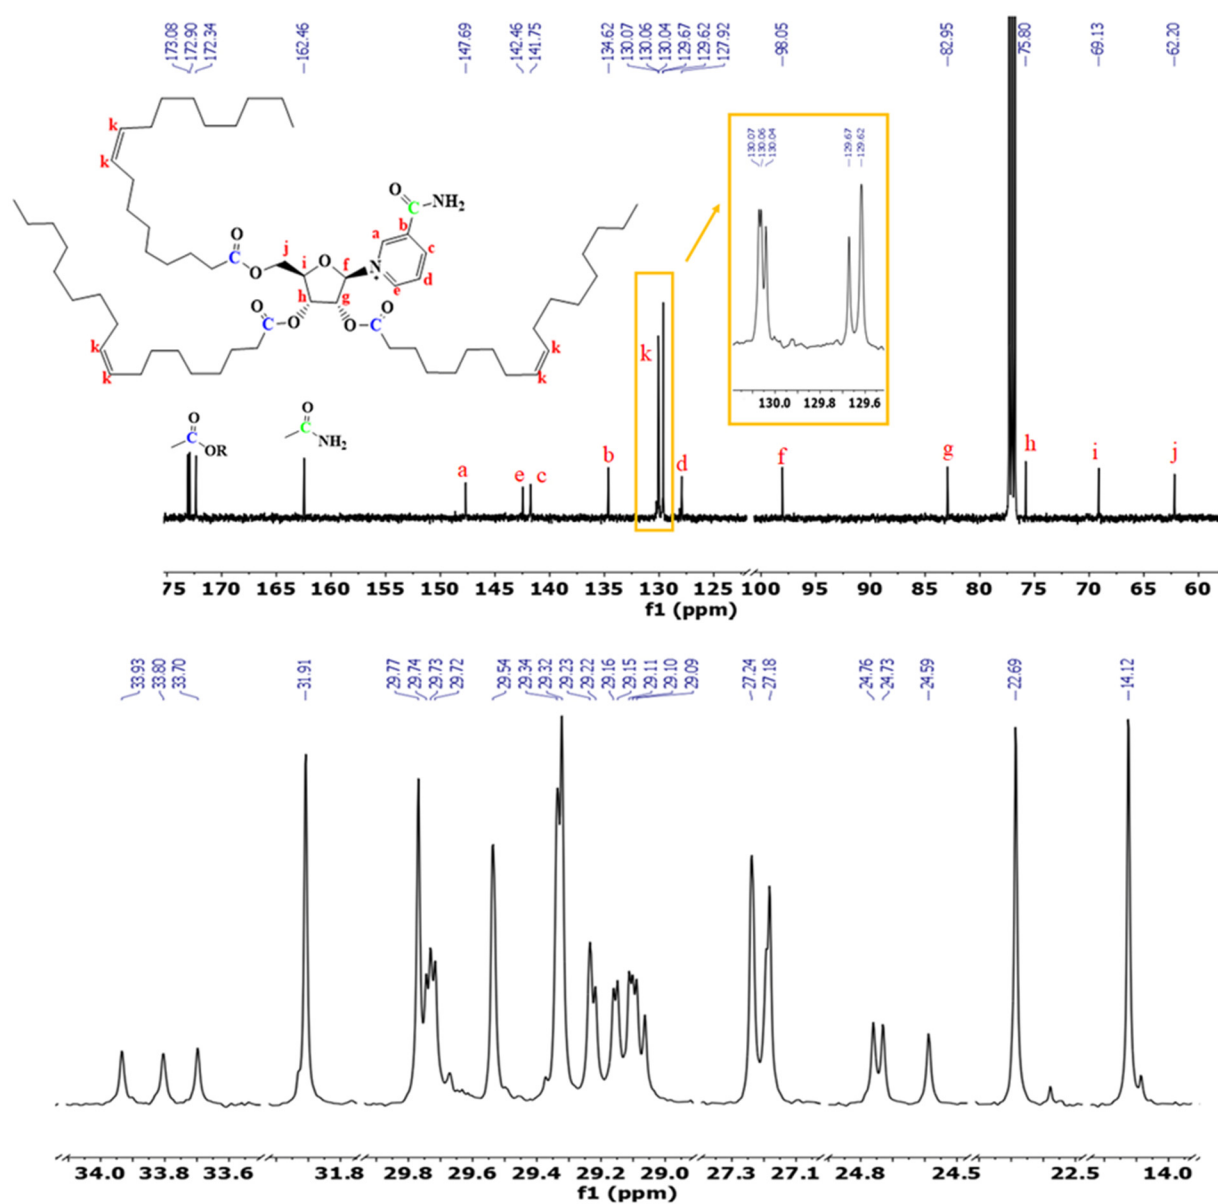

Figure S5. Expanded  $^{13}\text{C}$  NMR of NRTOCl.

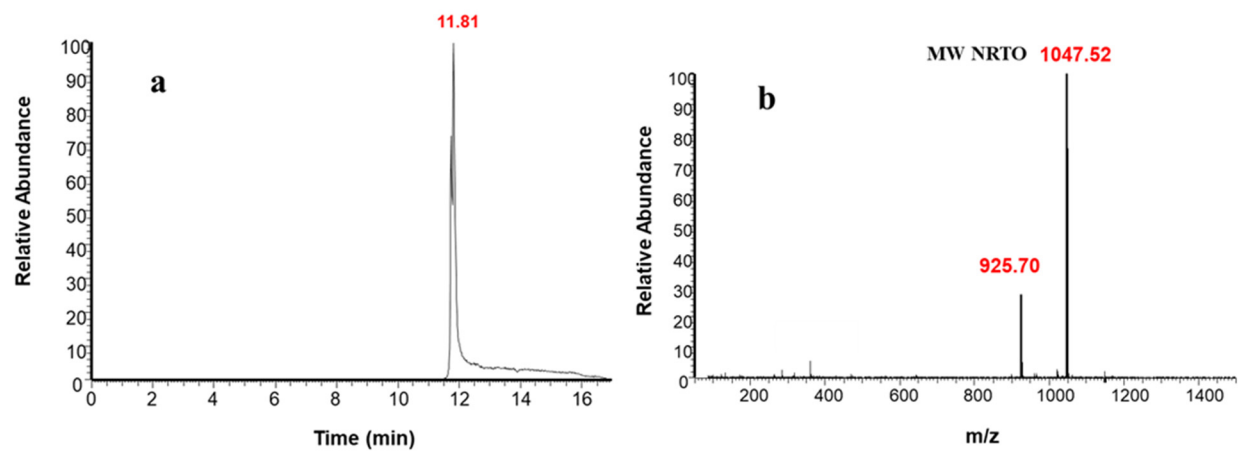

Figure S6. SRM LC-MS of NRTOCl. a) SRM LC of NRTOCl. b) Mass spectrum of NRTOCl.

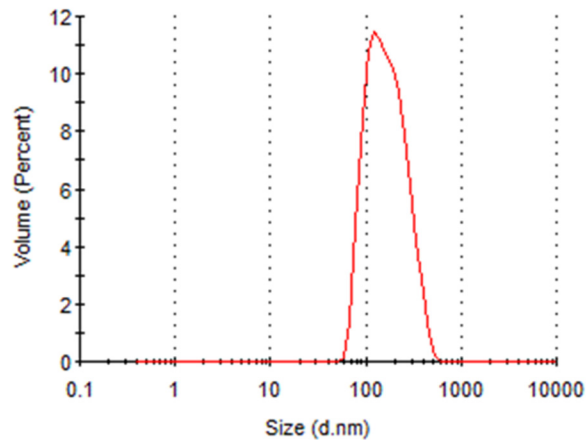

Figure S7. Particle size of NRTOCl in DI water containing 1 % (v/v) ethanol.
